# Supplementary material for: Synthesis and electrochemical evaluation of nickel hydroxide nanosheets with phase transition to nickel oxide
Source: Royal Society of Chemistry journal article supplement (doi:10.1039/d4ra01120a), 2024-01-01
Supplement: d4ra01120a1.pdf [file d4ra01120a1.pdf]

## Supporting Information

# Synthesis and Electrochemical Evaluation of Nickel Hydroxide Nanosheets with Phase Transition to Nickel Oxide

*Minjeong Lee<sup>‡a</sup>, Yeongeun Jang<sup>‡b</sup>, Gayoung Yoon<sup>c</sup>, Seonghwa Lee<sup>b\*</sup> and Gyeong Hee Ryu<sup>a,c\*</sup>*

<sup>1</sup> Department of Materials Engineering and Convergence Technology, Gyeongsang National University, Jinju 52828, Republic of Korea

<sup>2</sup> Department of Chemical Engineering, Changwon National University, 51140 Changwon, Republic of Korea

<sup>3</sup> School of Materials Science and Engineering, Gyeongsang National University, Jinju, 52828 Republic of Korea

<sup>‡</sup>Minjeong Lee and Yeongeun Jang are equally contributed as first authors.

\*Email: [seunghwa@changwon.ac.kr](mailto:seunghwa@changwon.ac.kr), [gh.ryu@gnu.ac.kr](mailto:gh.ryu@gnu.ac.kr)

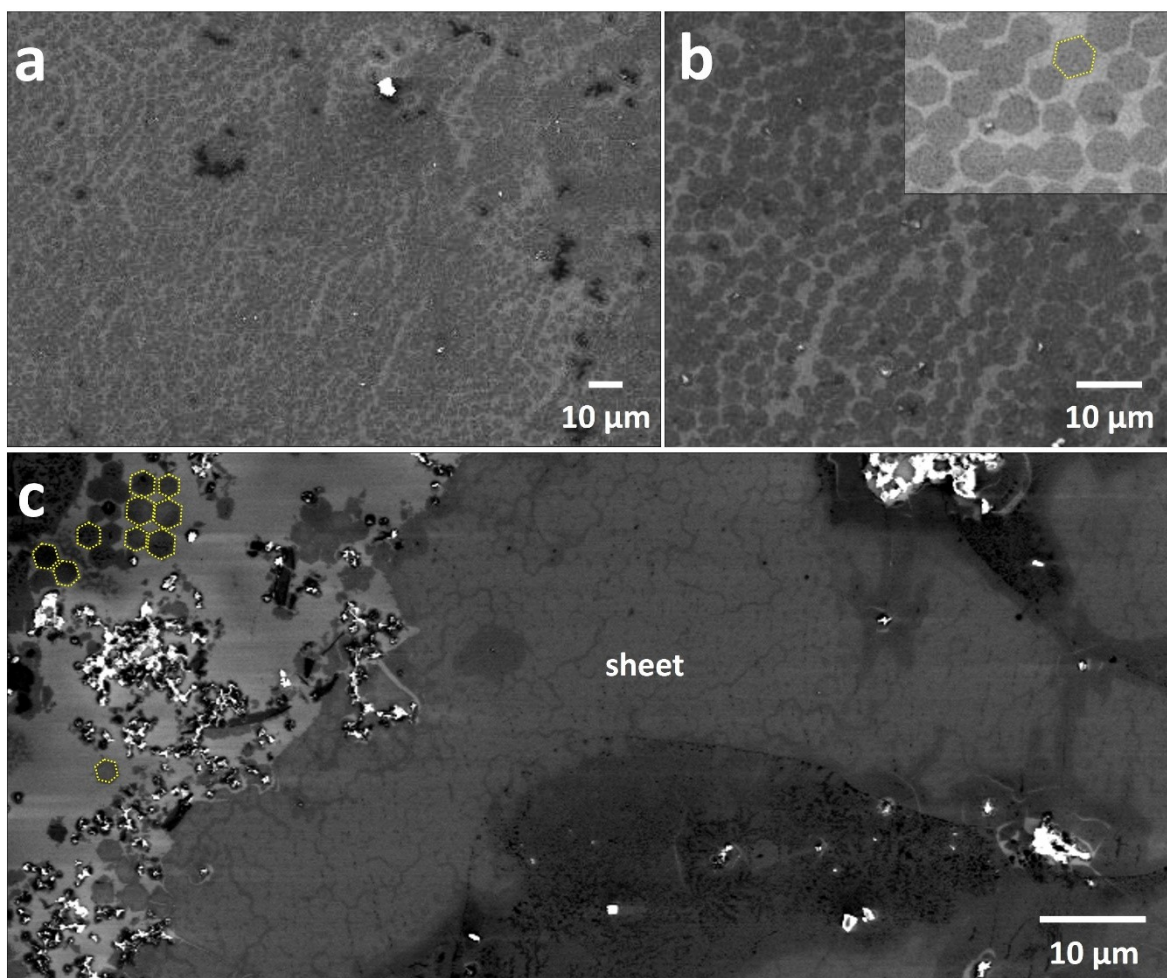

**Figure S1.** Scanning electron microscopy (SEM) images showing the (a, b) synthesized hexagonal  $\text{Ni}(\text{OH})_2$  islands and (c) large-area nanosheet (c).

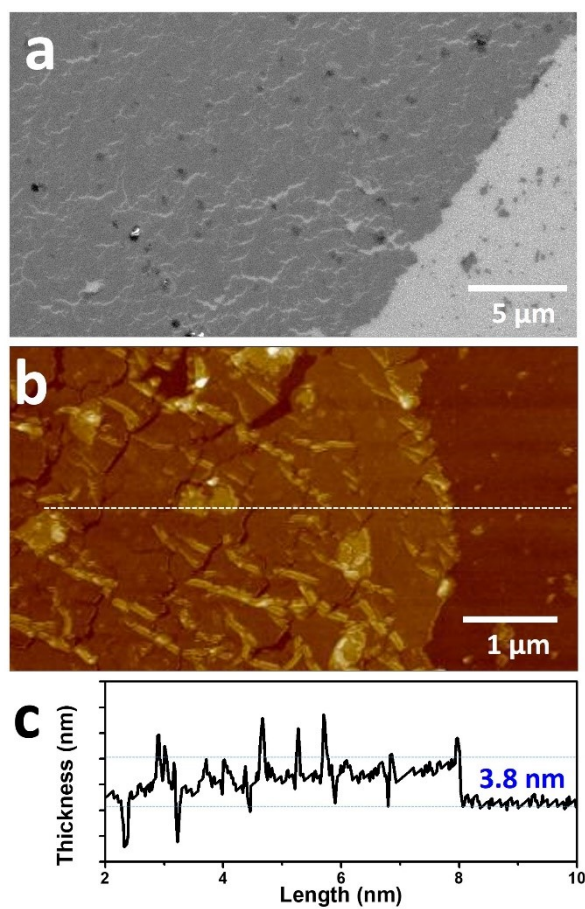

**Figure S2.** (a) SEM and (b) atomic force microscopy topography images showing the thickness of the nanosheet. (c) Height profile along the lines in (b).

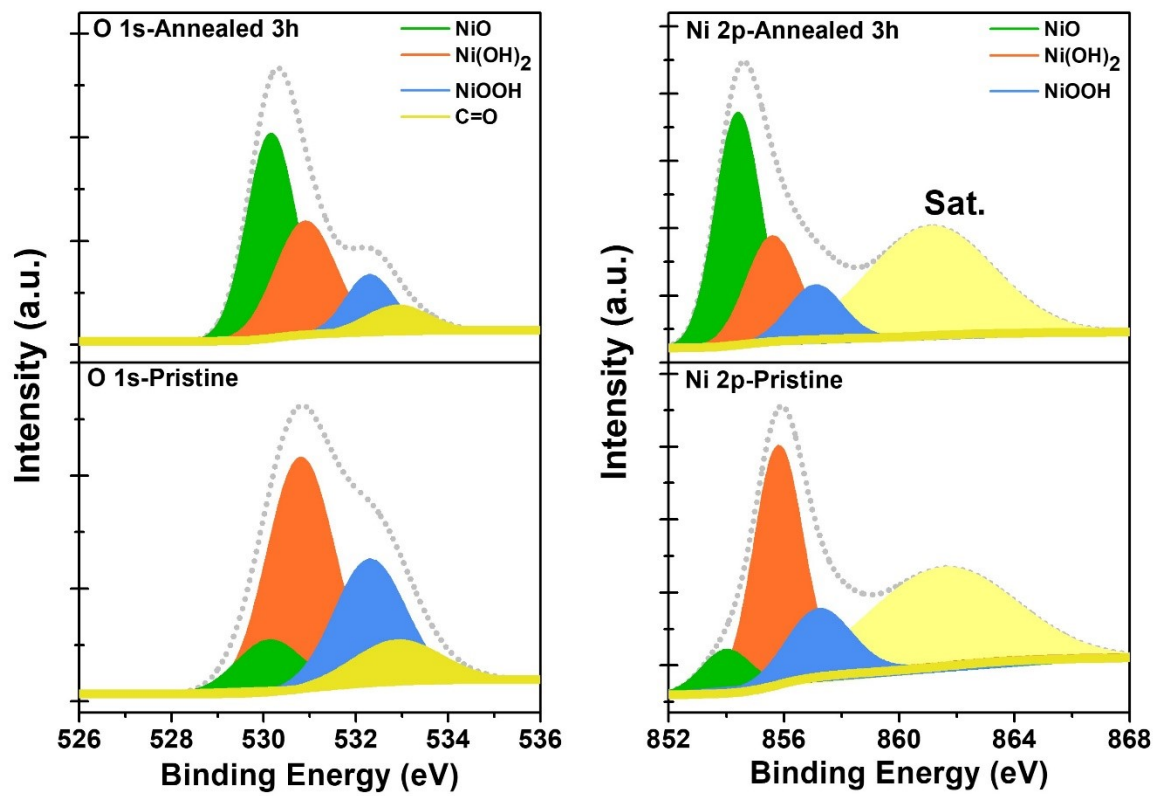

Figure S3. X-ray photoelectron spectra of the pristine and annealed nanosheets.

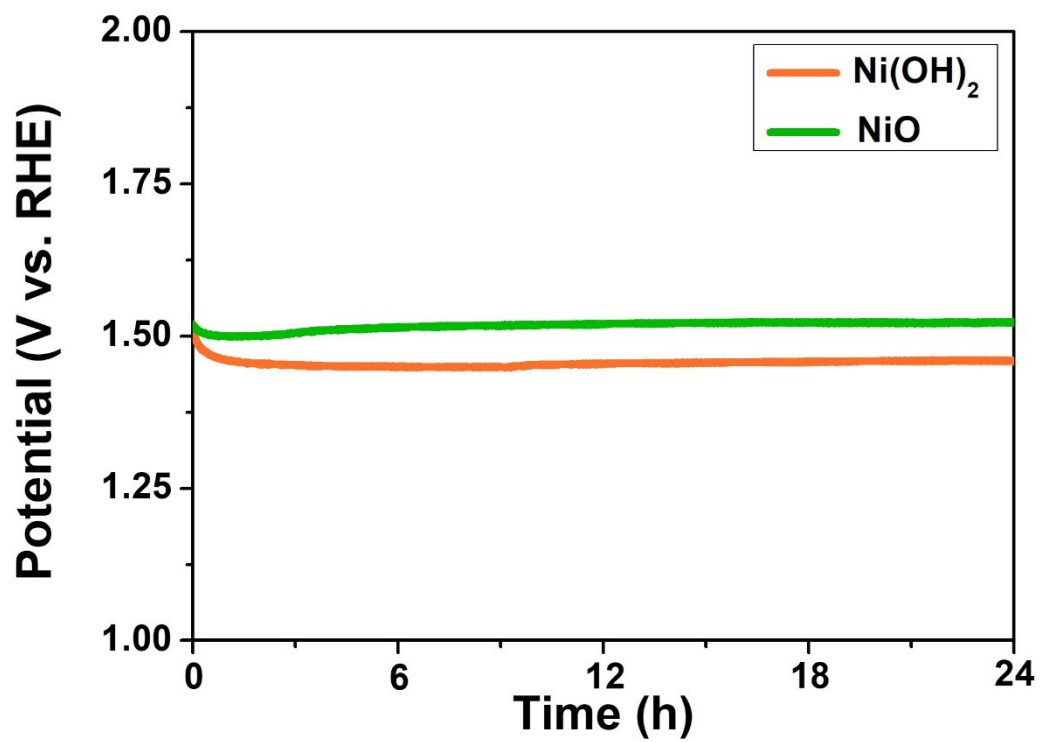

**Figure S4.** Results of the continuous oxygen evolution reaction chronopotentiometry test for Ni(OH)<sub>2</sub> and NiO nanosheets at 10 mA cm<sup>-2</sup>.

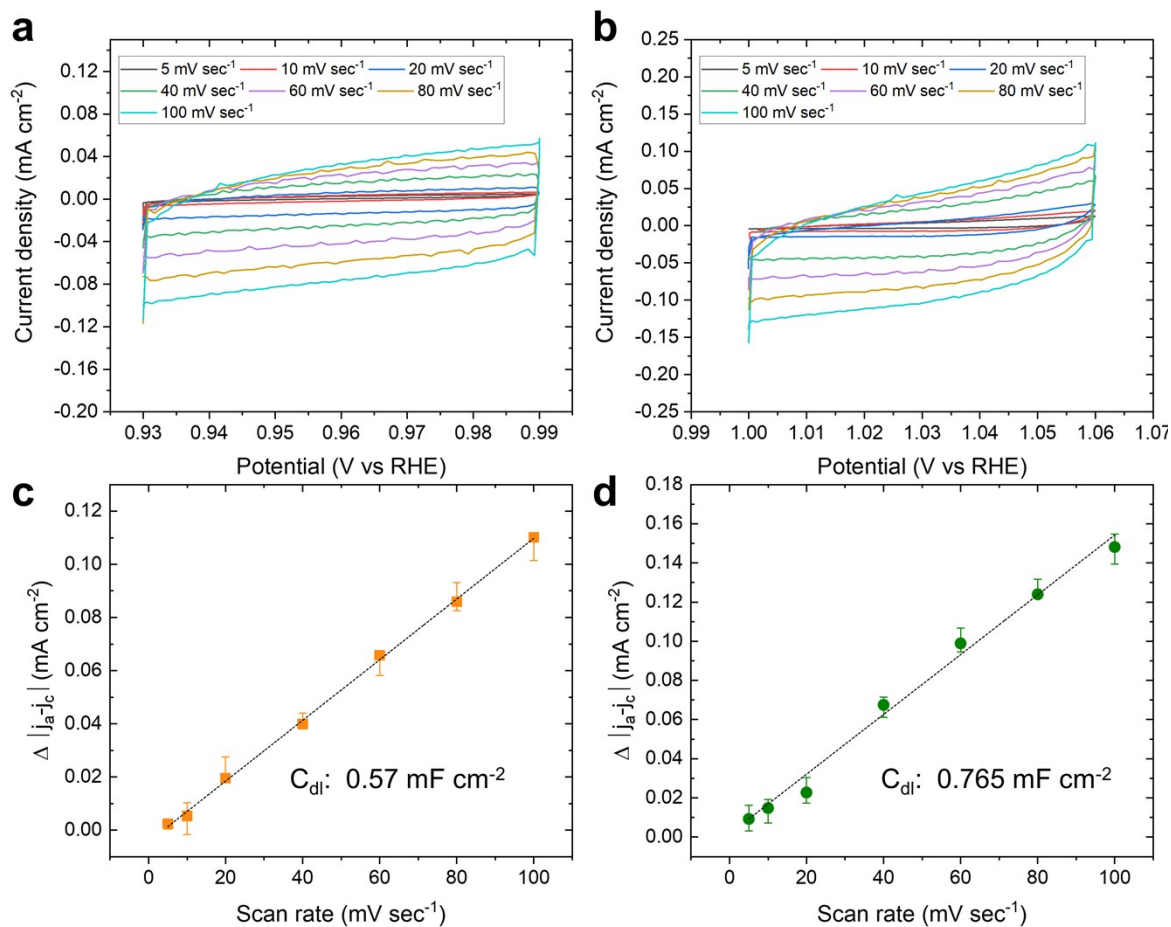

**Figure S5.** Cyclic voltammograms of (a) Ni(OH)<sub>2</sub> and (b) NiO in 1 M Fe-free KOH solutions at different scan rates (5, 10, 20, 40, 60, 80, and 100 mV s<sup>-1</sup>) for estimating  $C_{dl}$ . Plots of the difference between the anodic and cathodic current densities,  $\Delta J = |j_a - j_c|$ , at the different scan rates for the (c) Ni(OH)<sub>2</sub> and (d) NiO samples, respectively.
